# Supplementary material for: Bis(tetrelocenes) – fusing tetrelocenes into close proximity
Source: Royal Society of Chemistry journal article supplement (doi:10.1039/d3dt02664g), 2023-01-01
Supplement: d3dt02664g2.pdf [file d3dt02664g2.pdf]

# Supporting Information

for

## **Bis(tetrelocenes) – fusing tetrelocenes into close proximity**

Inga-Alexandra Bischoff,<sup>a</sup> Bernd Morgenstern,<sup>a</sup> Michael Zimmer,<sup>a</sup> Aylin Koldemir,<sup>b</sup>  
Rainer Pöttgen<sup>b</sup> and André Schäfer<sup>\*a</sup>

<sup>a</sup> Department of Chemistry, Faculty of Natural Sciences and Technology, Saarland University, Campus Saarbrücken, 66123 Campus Saarbrücken, Germany

<sup>b</sup> Institut für Anorganische und Analytische Chemie, Universität Münster, Corrensstrasse 30, 48149 Münster, Germany

|                              |                |
|------------------------------|----------------|
| <b>NMR spectra</b>           | <b>S1-S5</b>   |
| <b>Mössbauer spectra</b>     | <b>S6</b>      |
| <b>XRD data</b>              | <b>S7-S10</b>  |
| <b>IR spectra</b>            | <b>S11-S12</b> |
| <b>UV-Vis spectra</b>        | <b>S13-S14</b> |
| <b>Computational details</b> | <b>S15-S18</b> |
| <b>References</b>            | <b>S19</b>     |

## NMR spectra

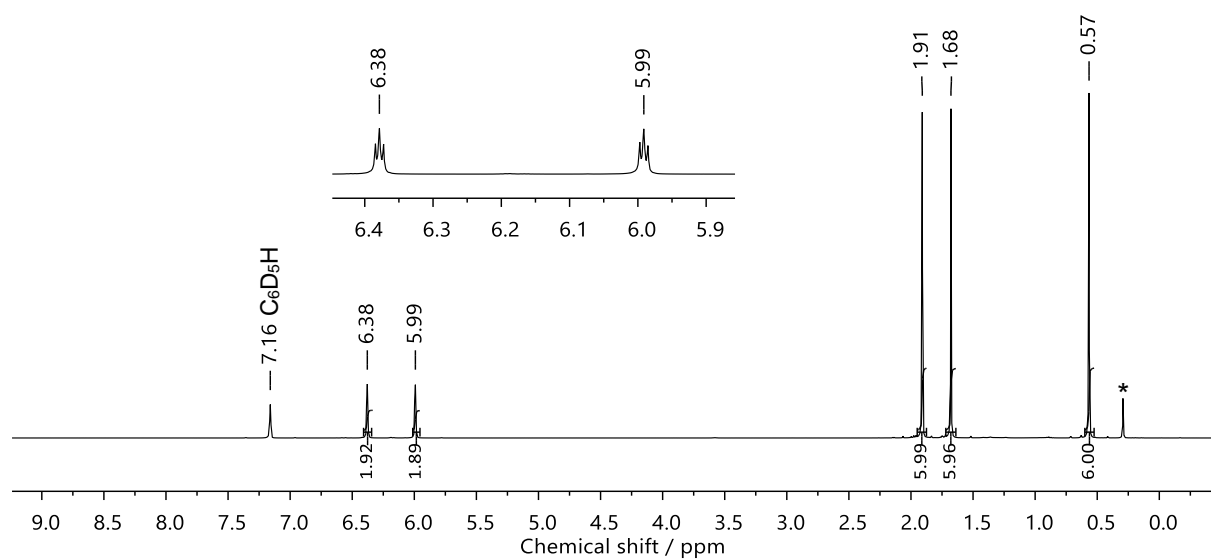

**Figure S1:**  $^1\text{H}$  NMR spectrum of **2a** (400.13 MHz,  $\text{C}_6\text{D}_6$ , 296 K) (\* silicone grease).

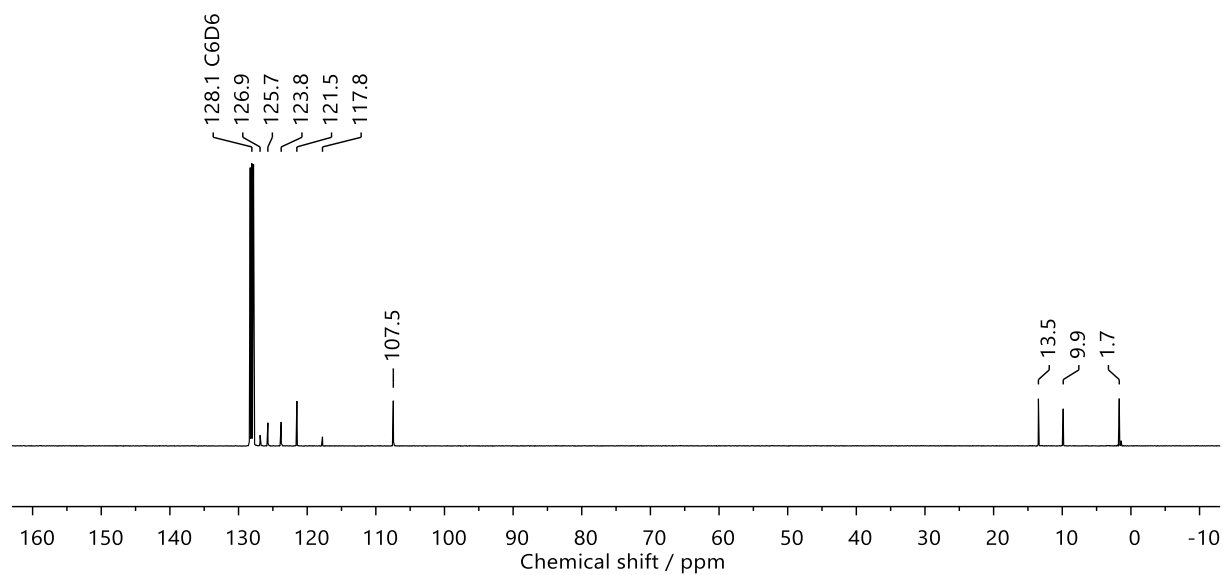

**Figure S2:**  $^{13}\text{C}\{^1\text{H}\}$  NMR spectrum of **2a** (100.61 MHz,  $\text{C}_6\text{D}_6$ , 296 K).

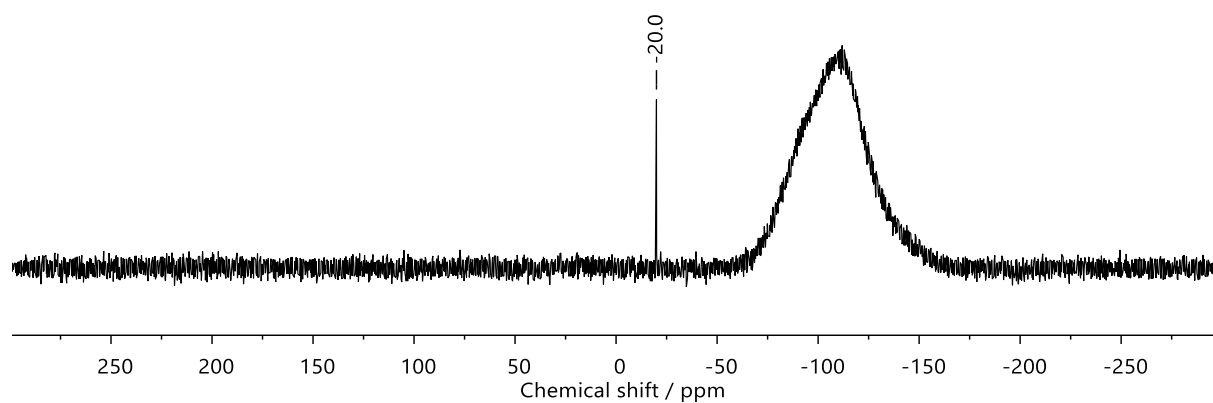

**Figure S3:**  $^{29}\text{Si}\{^1\text{H}\}$  NMR spectrum of **2a** (79.49 MHz,  $\text{C}_6\text{D}_6$ , 296 K).

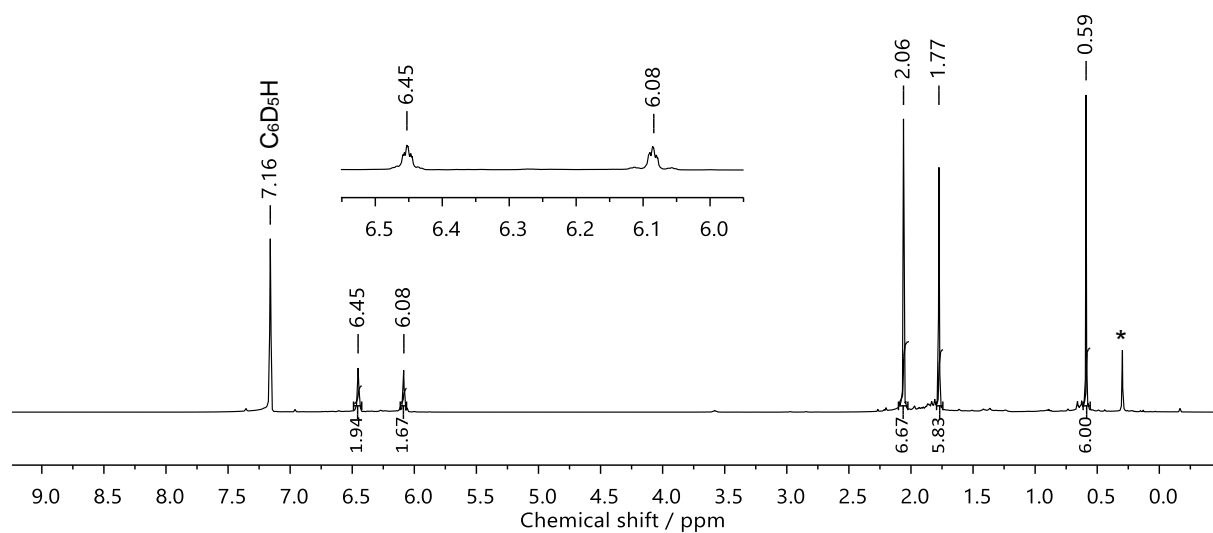

**Figure S4:**  $^1\text{H}$  NMR spectrum of **2c** (400.13 MHz,  $\text{C}_6\text{D}_6$ , 296 K) (\*silicone grease).

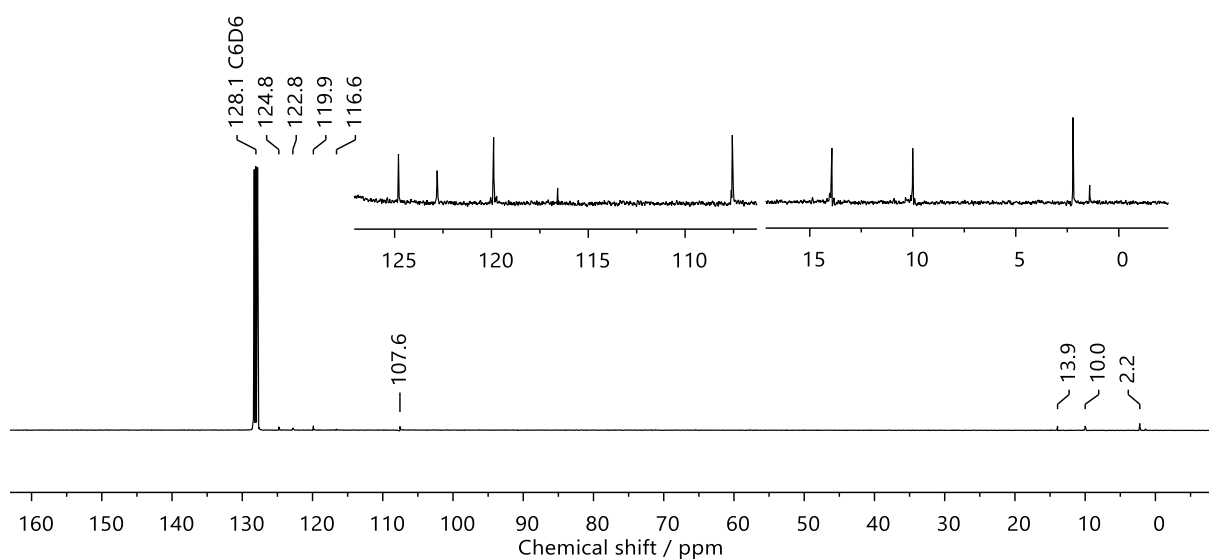

**Figure S5:**  $^{13}\text{C}\{^1\text{H}\}$  NMR spectrum of **2c** (100.61 MHz,  $\text{C}_6\text{D}_6$ , 296 K).

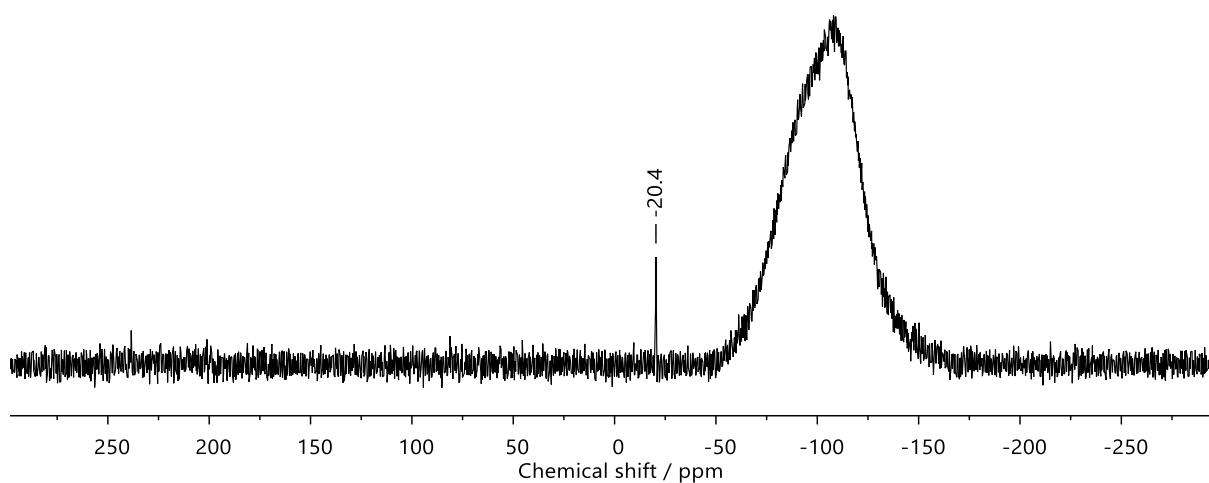

**Figure S6:**  $^{29}\text{Si}\{^1\text{H}\}$  NMR spectrum of **2c** (79.49 MHz,  $\text{C}_6\text{D}_6$ , 296 K).

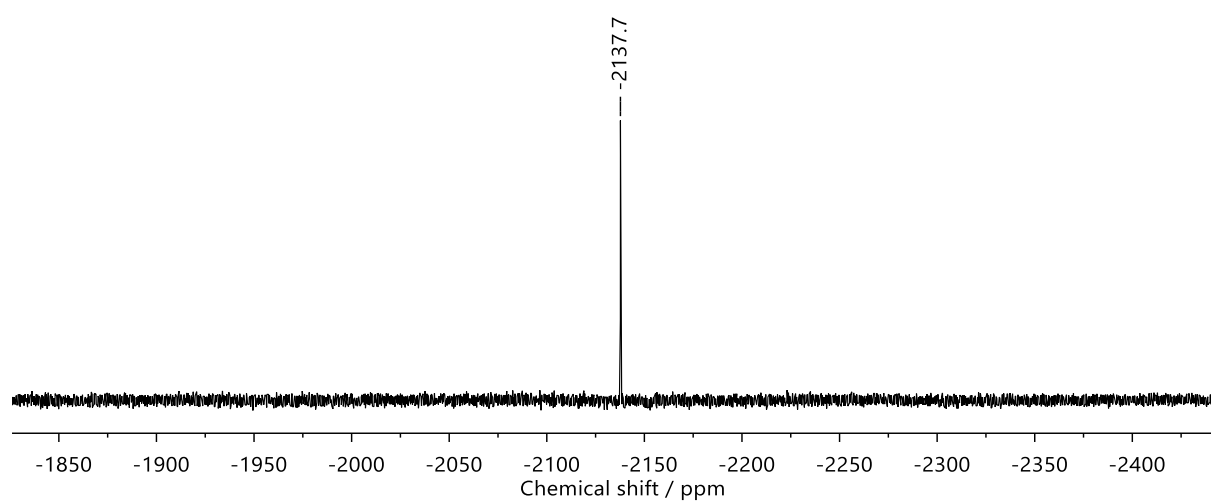

**Figure S7:**  $^{119}\text{Sn}\{^1\text{H}\}$  NMR spectrum of **2c** (149.21 MHz,  $\text{C}_6\text{D}_6$ , 294 K).

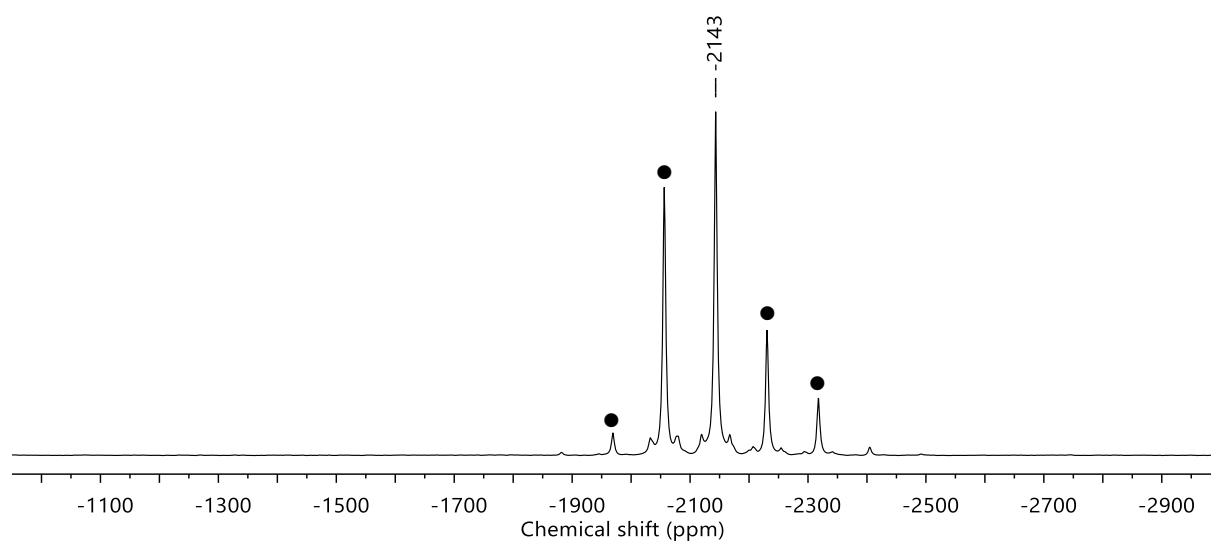

**Figure S8:**  $^{119}\text{Sn}$  CP/MAS NMR spectrum of **2c** (13 kHz, 297 K) (● spinning sideband).

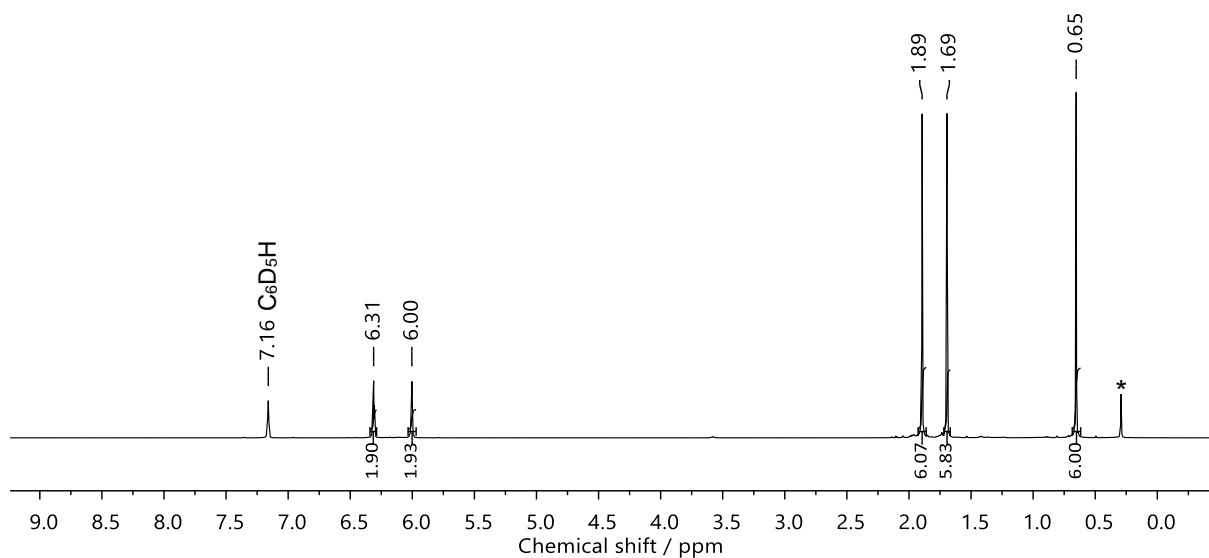

**Figure S9:**  $^1\text{H}$  NMR spectrum of **2b** (400.13 MHz,  $\text{C}_6\text{D}_6$ , 296 K) (\*silicone grease).

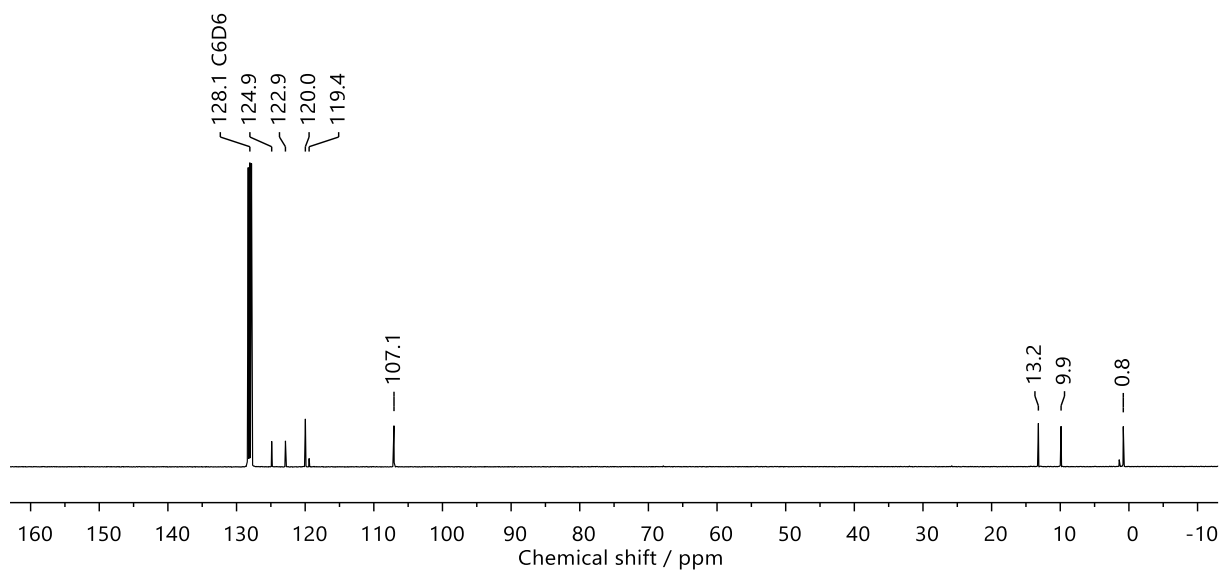

**Figure S10:**  $^{13}\text{C}\{^1\text{H}\}$  NMR spectrum of **2b** (100.61 MHz,  $\text{C}_6\text{D}_6$ , 296 K).

## Mössbauer spectra

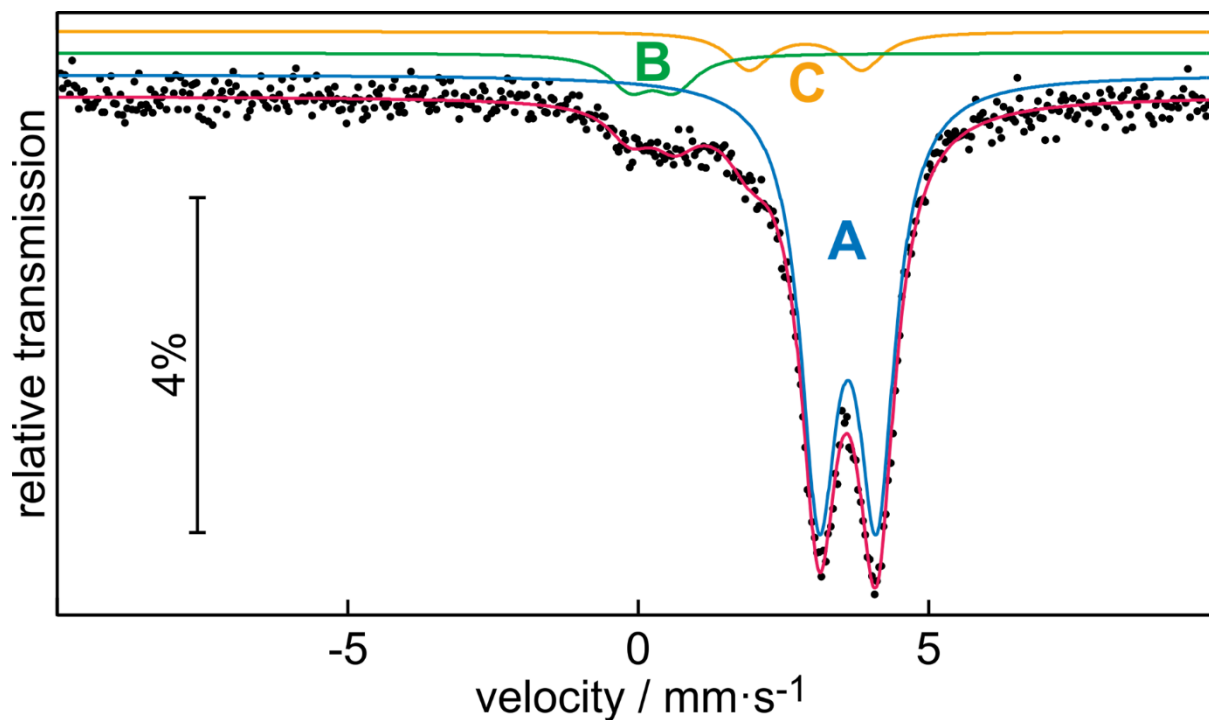

**Figure S11:** Experimental and simulated  $^{119}\text{Sn}$  Mössbauer spectrum of **2c**.

**Table S1:** Fitting parameters of the  $^{119}\text{Sn}$  Mössbauer spectrum recorded at 78 K.  $\delta$  = isomer shift,  $\Delta E_Q$  = electric quadrupole splitting,  $\Gamma$  = experimental line width.

| signal | $\delta$ (mm·s $^{-1}$ ) | $\Delta E_Q$ (mm·s $^{-1}$ ) | $\Gamma$ (mm·s $^{-1}$ ) | area  |
|--------|--------------------------|------------------------------|--------------------------|-------|
| A      | 3.611(3)                 | 0.991(8)                     | 0.77(1)                  | 83(1) |
| B      | 0.25(5)                  | 0.77(7)                      | 0.9(1)                   | 8(1)  |
| C      | 2.88(4)                  | 1.94(8)                      | 0.9(2)                   | 9(1)  |

## XRD data

Crystal structure data has been deposited with the Cambridge Crystallographic Data Centre (CCDC) and is available free of charge from the Cambridge Crystallographic Database (see reference numbers).

|                                   |                                                                 |                            |
|-----------------------------------|-----------------------------------------------------------------|----------------------------|
| <b>2a:</b>                        |                                                                 |                            |
| CCDC                              | 2288212                                                         |                            |
| Empirical formula                 | C <sub>32</sub> H <sub>44</sub> Ge <sub>2</sub> Si <sub>2</sub> |                            |
| Formula weight                    | 630.03                                                          |                            |
| Temperature                       | 133(2) K                                                        |                            |
| Wavelength                        | 0.71073 Å                                                       |                            |
| Crystal system                    | monoclinic                                                      |                            |
| Space group                       | C2                                                              |                            |
| Unit cell dimensions              | a = 17.5006(7) Å                                                | $\alpha = 90^\circ$        |
|                                   | b = 8.6628(3) Å                                                 | $\beta = 130.200(2)^\circ$ |
|                                   | c = 13.3527(6) Å                                                | $\gamma = 90^\circ$        |
| Volume                            | 1546.17(11) Å <sup>3</sup>                                      |                            |
| Z                                 | 2                                                               |                            |
| Density (calculated)              | 1.35 g/cm <sup>3</sup>                                          |                            |
| Absorption coefficient            | 2.0 mm <sup>-1</sup>                                            |                            |
| F(000)                            | 656                                                             |                            |
| Crystal size                      | 0.306 x 0.163 x 0.128 mm <sup>3</sup>                           |                            |
| Theta range for data collection   | 1.997 to 32.052°                                                |                            |
| Index ranges                      | -26 ≤ h ≤ 20, -12 ≤ k ≤ 12, -18 ≤ l ≤ 19                        |                            |
| Reflections collected             | 36114                                                           |                            |
| Independent reflections           | 5375 [R(int) = 0.0249]                                          |                            |
| Completeness to theta = 25.242°   | 99.7 %                                                          |                            |
| Absorption correction             | semi-empirical from equivalents                                 |                            |
| Max. and min. transmission        | 0.746 and 0.649                                                 |                            |
| Refinement method                 | full-matrix least-squares on F <sup>2</sup>                     |                            |
| Data / restraints / parameters    | 5375 / 1 / 169                                                  |                            |
| Goodness-of-fit on F <sup>2</sup> | 1.081                                                           |                            |
| Final R indices [I > 2σ(I)]       | R1 = 0.0139, wR2 = 0.0371                                       |                            |
| R indices (all data)              | R1 = 0.0143, wR2 = 0.0372                                       |                            |
| Absolute structure parameter      | 0.0102(18)                                                      |                            |
| Extinction coefficient            | n/a                                                             |                            |
| Largest diff. peak and hole       | 0.28 and -0.21 e.Å <sup>-3</sup>                                |                            |

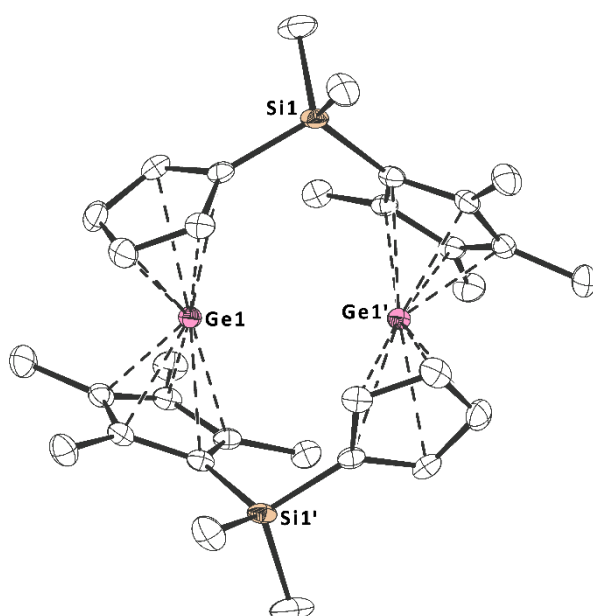

**Figure S12:** Molecular structure of **2a** in the crystal (displacement ellipsoids at 50% probability level; H atoms omitted for clarity; symmetry label: Ge1<sup>#1</sup>: #1: x, y, z, Ge1<sup>#2</sup>: #2: 1-x, y, 1-z).



|                                 |                                                 |                              |
|---------------------------------|-------------------------------------------------|------------------------------|
| <b>2b:</b>                      |                                                 |                              |
| CCDC                            | 2288213                                         |                              |
| Empirical formula               | C <sub>32</sub> H <sub>44</sub> Ge <sub>4</sub> |                              |
| Formula weight                  | 719.03                                          |                              |
| Temperature                     | 133(2) K                                        |                              |
| Wavelength                      | 0.71073 Å                                       |                              |
| Crystal system                  | monoclinic                                      |                              |
| Space group                     | C2                                              |                              |
| Unit cell dimensions            | a = 17.4066(7) Å                                | $\alpha = 90^\circ$          |
|                                 | b = 8.7580(4) Å                                 | $\beta = 128.6390(10)^\circ$ |
|                                 | c = 13.1177(6) Å                                | $\gamma = 90^\circ$          |
| Volume                          | 1562.00(12) Å <sup>3</sup>                      |                              |
| Z                               | 2                                               |                              |
| Density (calculated)            | 1.53 g/cm <sup>3</sup>                          |                              |
| Absorption coefficient          | 3.8 mm <sup>-1</sup>                            |                              |
| F(000)                          | 728                                             |                              |
| Crystal size                    | 0.156 x 0.117 x 0.051 mm <sup>3</sup>           |                              |
| Theta range for data collection | 1.988 to 31.522°                                |                              |
| Index ranges                    | -25 ≤ h ≤ 25, -12 ≤ k ≤ 12, -19 ≤ l ≤ 19        |                              |
| Reflections collected           | 21387                                           |                              |
| Independent reflections         | 5215 [R(int) = 0.0322]                          |                              |
| Completeness to theta = 25.242° | 100.0 %                                         |                              |
| Absorption correction           | semi-empirical from equivalents                 |                              |
| Max. and min. transmission      | 0.746 and 0.649                                 |                              |
| Refinement method               | full-matrix least-squares on F <sup>2</sup>     |                              |
| Data / restraints / parameters  | 5215 / 1 / 169                                  |                              |
| Goodness-of-fit on F2           | 1.019                                           |                              |
| Final R indices [I > 2σ(I)]     | R1 = 0.0213, wR2 = 0.0434                       |                              |
| R indices (all data)            | R1 = 0.0237, wR2 = 0.0443                       |                              |
| Absolute structure parameter    | 0.019(6)                                        |                              |
| Extinction coefficient          | n/a                                             |                              |
| Largest diff. peak and hole     | 0.32 and -0.28 e.Å <sup>-3</sup>                |                              |

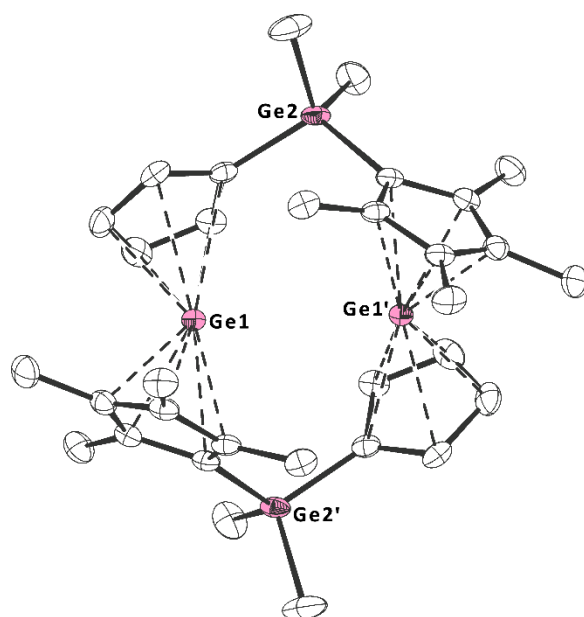

**Figure S13:** Molecular structure of **2b** in the crystal (displacement ellipsoids at 50% probability level; H atoms omitted for clarity; symmetry label: Ge1<sup>#1</sup>: #1: x, y, z, Ge1<sup>#2</sup>: #2: 1-x, y, 1-z).

|                                   |                                                                 |                     |
|-----------------------------------|-----------------------------------------------------------------|---------------------|
| <b>2c:</b>                        |                                                                 |                     |
| CCDC                              | 2288211                                                         |                     |
| Empirical formula                 | C <sub>32</sub> H <sub>44</sub> Si <sub>2</sub> Sn <sub>2</sub> |                     |
| Formula weight                    | 722.23                                                          |                     |
| Temperature                       | 133(2) K                                                        |                     |
| Wavelength                        | 0.71073 Å                                                       |                     |
| Crystal system                    | orthorhombic                                                    |                     |
| Space group                       | <i>Aba</i> 2                                                    |                     |
| Unit cell dimensions              | a = 16.7596(8) Å                                                | $\alpha = 90^\circ$ |
|                                   | b = 21.3357(10) Å                                               | $\beta = 90^\circ$  |
|                                   | c = 8.6837(4) Å                                                 | $\gamma = 90^\circ$ |
| Volume                            | 3105.1(3) Å <sup>3</sup>                                        |                     |
| Z                                 | 4                                                               |                     |
| Density (calculated)              | 1.55 g cm <sup>-3</sup>                                         |                     |
| Absorption coefficient            | 1.7 mm <sup>-1</sup>                                            |                     |
| F(000)                            | 1456                                                            |                     |
| Crystal size                      | 0.243 x 0.123 x 0.094 mm <sup>3</sup>                           |                     |
| Theta range for data collection   | 2.263 to 26.697°                                                |                     |
| Index ranges                      | -21 ≤ h ≤ 21, -26 ≤ k ≤ 26, -10 ≤ l ≤ 10                        |                     |
| Reflections collected             | 51606                                                           |                     |
| Independent reflections           | 3285 [R(int) = 0.0260]                                          |                     |
| Completeness to theta = 25.242°   | 99.9 %                                                          |                     |
| Absorption correction             | semi-empirical from equivalents                                 |                     |
| Max. and min. transmission        | 0.745 and 0.691                                                 |                     |
| Refinement method                 | full-matrix least-squares on F <sup>2</sup>                     |                     |
| Data / restraints / parameters    | 3285 / 1 / 169                                                  |                     |
| Goodness-of-fit on F <sup>2</sup> | 1.106                                                           |                     |
| Final R indices [I > 2σ(I)]       | R1 = 0.0112, wR2 = 0.0303                                       |                     |
| R indices (all data)              | R1 = 0.0114, wR2 = 0.0304                                       |                     |
| Absolute structure parameter      | -0.003(5)                                                       |                     |
| Extinction coefficient            | n/a                                                             |                     |
| Largest diff. peak and hole       | 0.19 and -0.32 e.Å <sup>-3</sup>                                |                     |

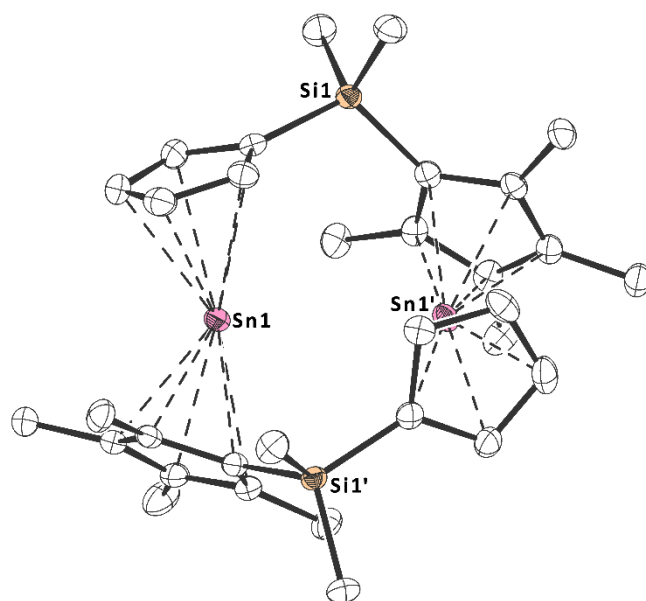

**Figure S14:** Molecular structure of **2c** in the crystal (displacement ellipsoids at 50% probability level; H atoms omitted for clarity; symmetry label: Sn1<sup>#1</sup>: #1: x, y, z, Sn1<sup>#2</sup>: #2: 1-x, 1-y, z).

**Table S2:** E–C<sup>Cp</sup>/C<sup>Cp#</sup> bond distances in **2a-c** in pm.

|                        | <b>2a</b><br><b>(E = Ge)</b>                                 | <b>2b</b><br><b>(E = Ge)</b>                                 | <b>2c</b><br><b>(E = Sn)</b>                                 |
|------------------------|--------------------------------------------------------------|--------------------------------------------------------------|--------------------------------------------------------------|
| <b>C<sup>Cp</sup></b>  | 276.9(1);<br>264.0(1);<br>246.4(2);<br>247.7(2);<br>265.2(1) | 277.2(2);<br>264.5(2);<br>246.2(4);<br>245.7(3);<br>265.0(3) | 287.0(2);<br>272.8(3);<br>260.5(3);<br>265.4(2);<br>281.4(2) |
| <b>C<sup>Cp#</sup></b> | 247.0(1);<br>232.9(1);<br>237.3(2);<br>254.6(1);<br>260.4(1) | 247.1(2);<br>262.0(2);<br>255.1(3);<br>237.0(3);<br>232.9(2) | 263.5(2);<br>252.8(2);<br>258.5(2);<br>274.7(2);<br>276.4(2) |

**Table S3:** Selected E–Cp/Cp# bond distances in **2a-c**.

|                                                                | <b>2a</b><br><b>(E = Ge)</b> | <b>2b</b><br><b>(E = Ge)</b> | <b>2c</b><br><b>(E = Sn)</b> |
|----------------------------------------------------------------|------------------------------|------------------------------|------------------------------|
| E–Cp <sup>centroid</sup>                                       | 230.87(2)                    | 230.78(3)                    | 245.71(3)                    |
| E–Cp <sup>plane</sup>                                          | 228.21                       | 227.79                       | 243.75                       |
| $\Delta(\text{Cp}^{\text{centroid}}\text{-Cp}^{\text{plane}})$ | 34.95                        | 37.03                        | 30.97                        |
| E–Cp <sup>#,centroid</sup>                                     | 214.71(2)                    | 215.34(2)                    | 235.92(4)                    |
| E–Cp <sup>#,plane</sup>                                        | 212.64                       | 213.00                       | 234.14                       |
| $\Delta(\text{Cp}^{\#,centroid}\text{-Cp}^{\#,plane})$         | 29.74                        | 31.66                        | 28.93                        |

## IR spectra

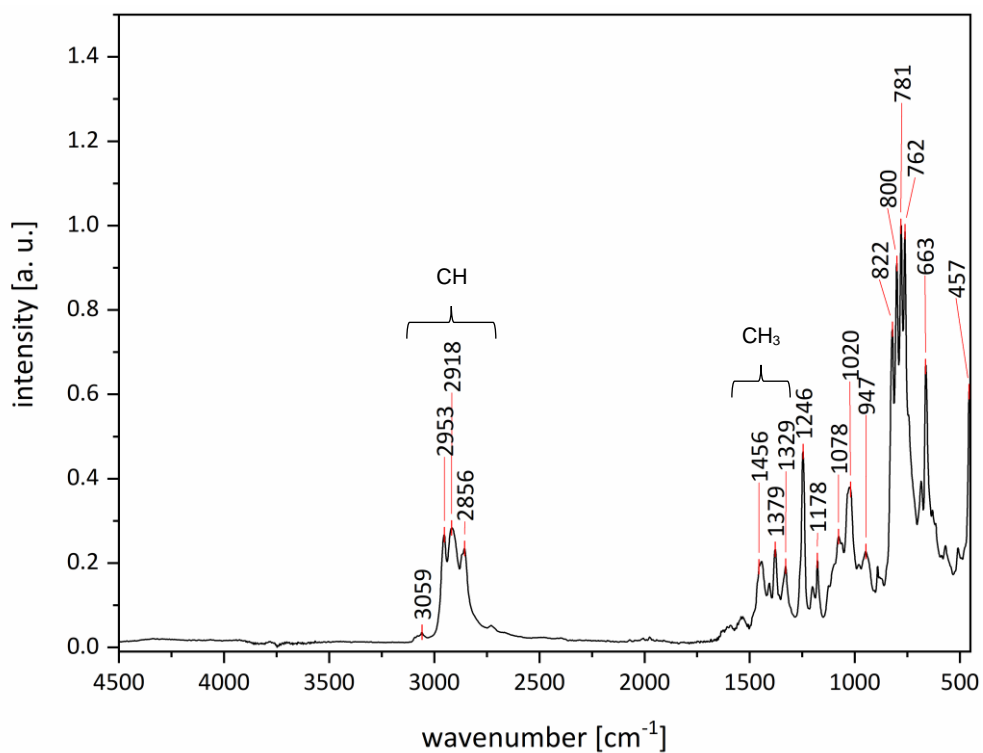

Figure S15: IR spectrum of 2a.

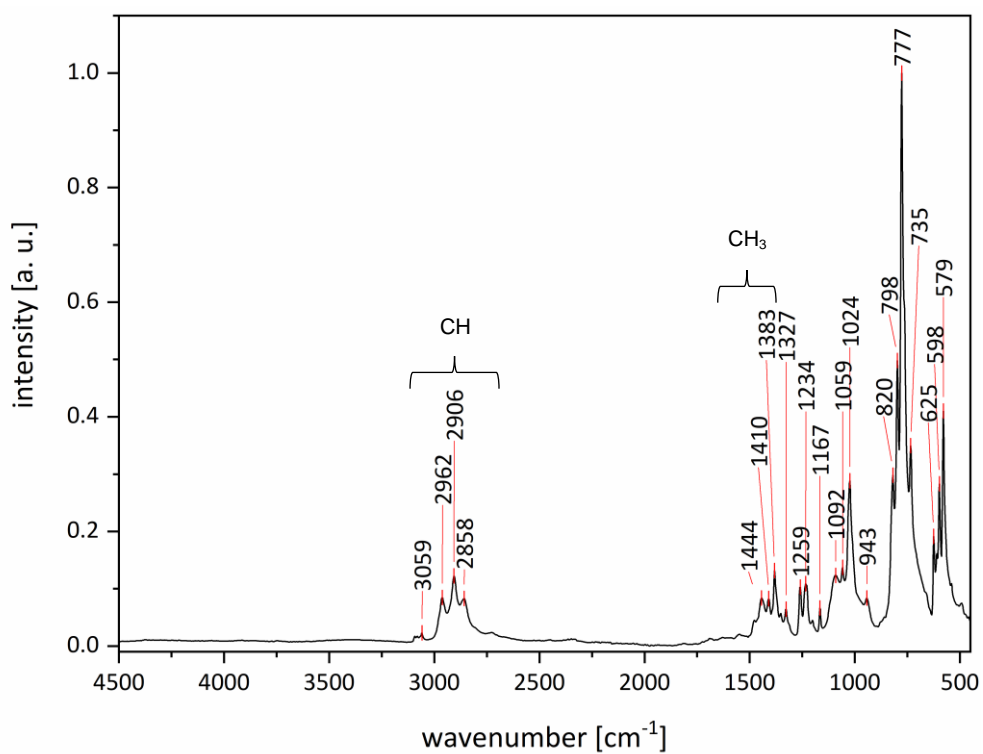

Figure S16: IR spectrum of 2b.

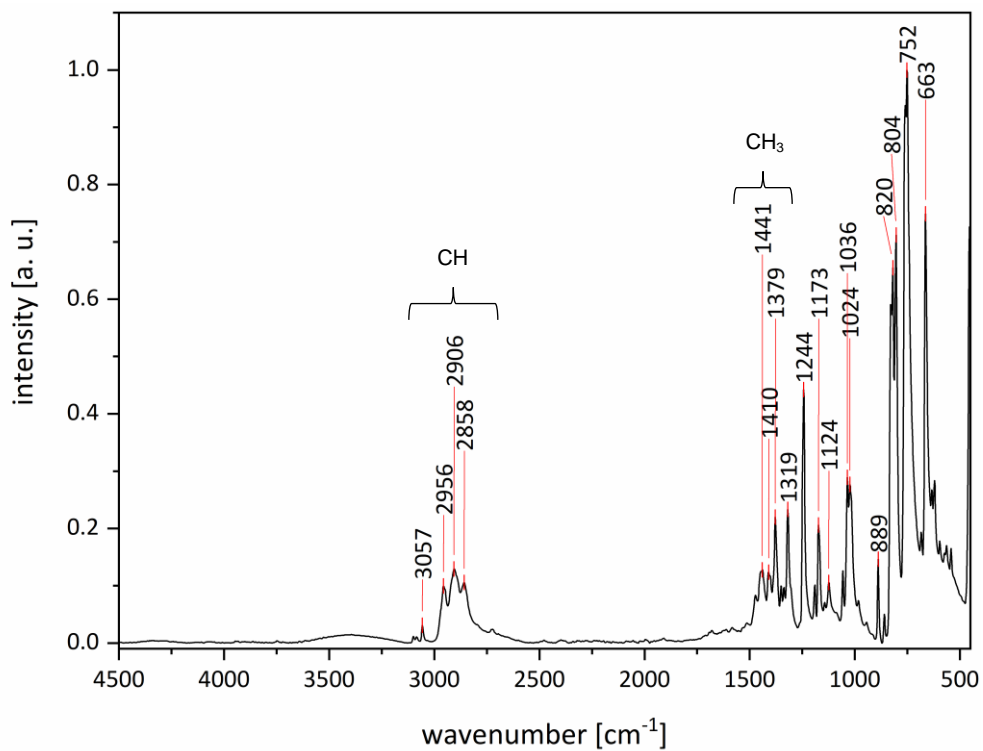

Figure S17: IR spectrum of 2c.

## UV-Vis spectra

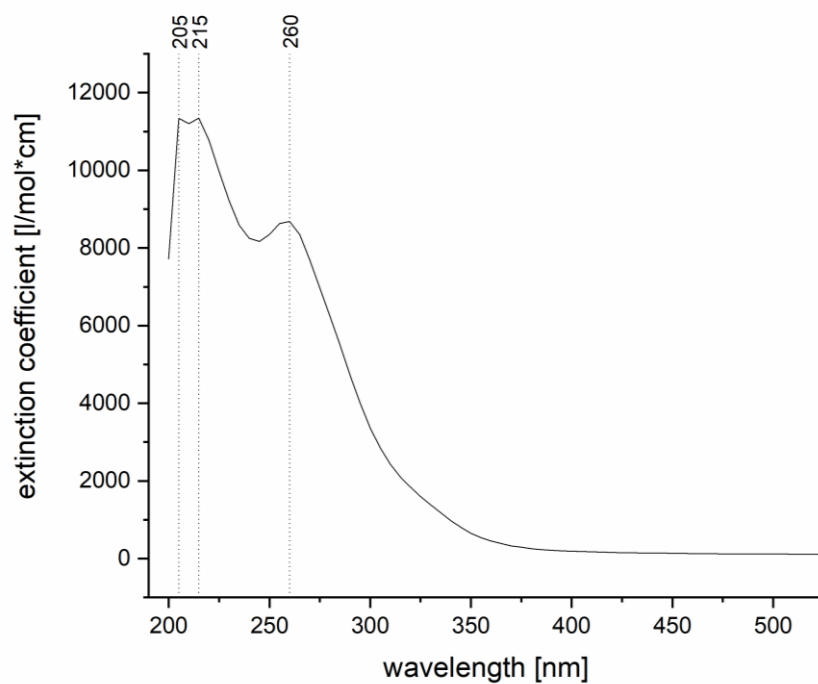

Figure S18: UV-Vis spectrum of **2a** ( $c = 8.67 \cdot 10^{-5} \text{ mol L}^{-1}$  in hexane).

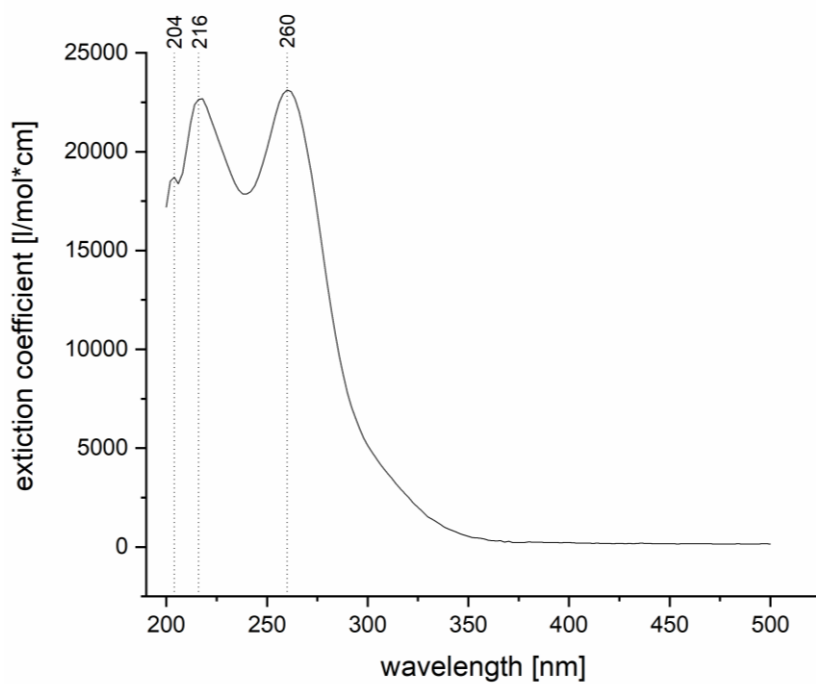

Figure S19: UV-Vis spectrum of **2b** ( $c = 2.32 \cdot 10^{-5} \text{ mol L}^{-1}$  in hexane).

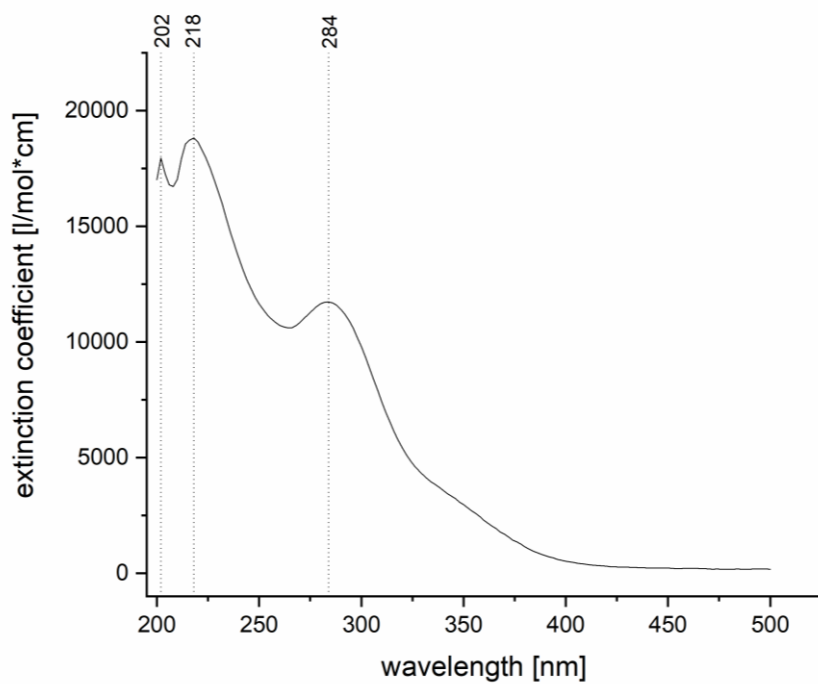

**Figure S20:** UV-Vis spectrum of **2c** ( $c = 3.08 \cdot 10^{-5} \text{ mol L}^{-1}$  in hexane).

## Computational details

All calculations were performed using the Gaussian 16, Revision C.01 package of programs.<sup>[1]</sup> Geometry optimizations have been carried out at the PBE0-D3/def2-TZVP level of theory and subsequent single-point calculations at the PBE0-D3/def2-TZVPP level of theory.<sup>[2]</sup> The optimized structures were confirmed to be minima on the potential energy surface by subsequent frequency analysis (all positive eigenvalues). NBO analysis were conducted with the NBO 7.0 software.<sup>[3]</sup> AIM analysis were carried out with AIMAll.<sup>[4]</sup>



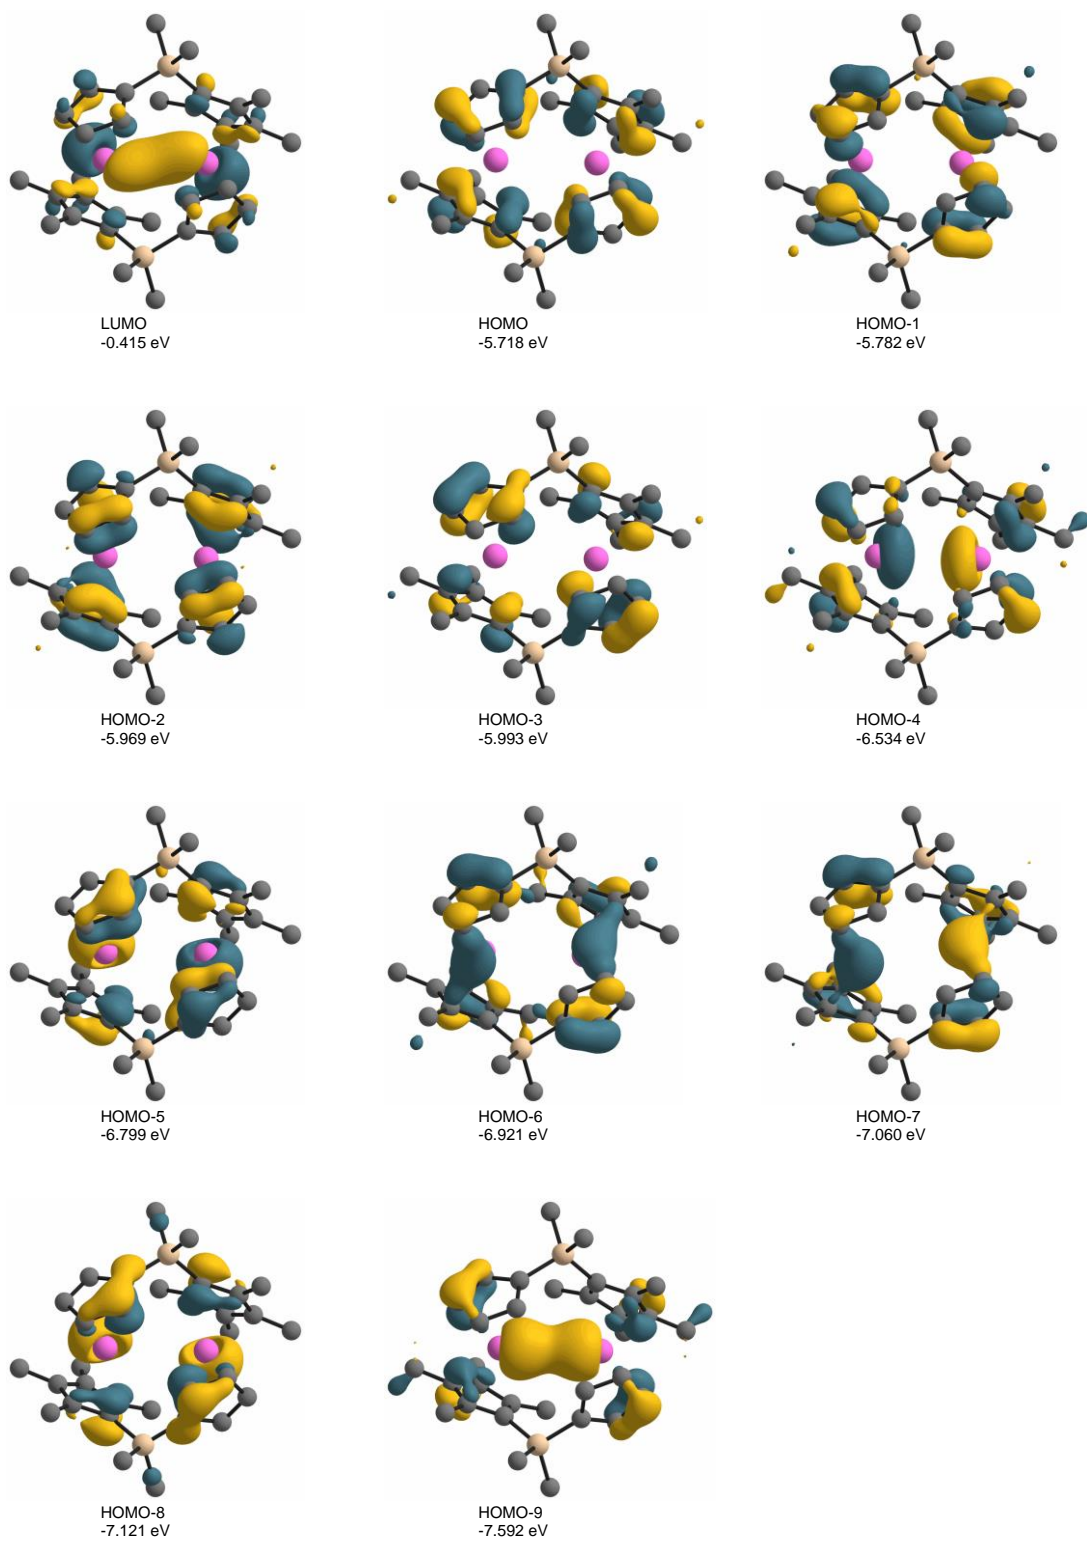

**Figure S15:** Kohn-Sham molecular orbital contours of **2a** (PBE0-D3/def2-TZVPP//PBE0-D3/def2-TZVP; isovalue = 0.04 a.u.).

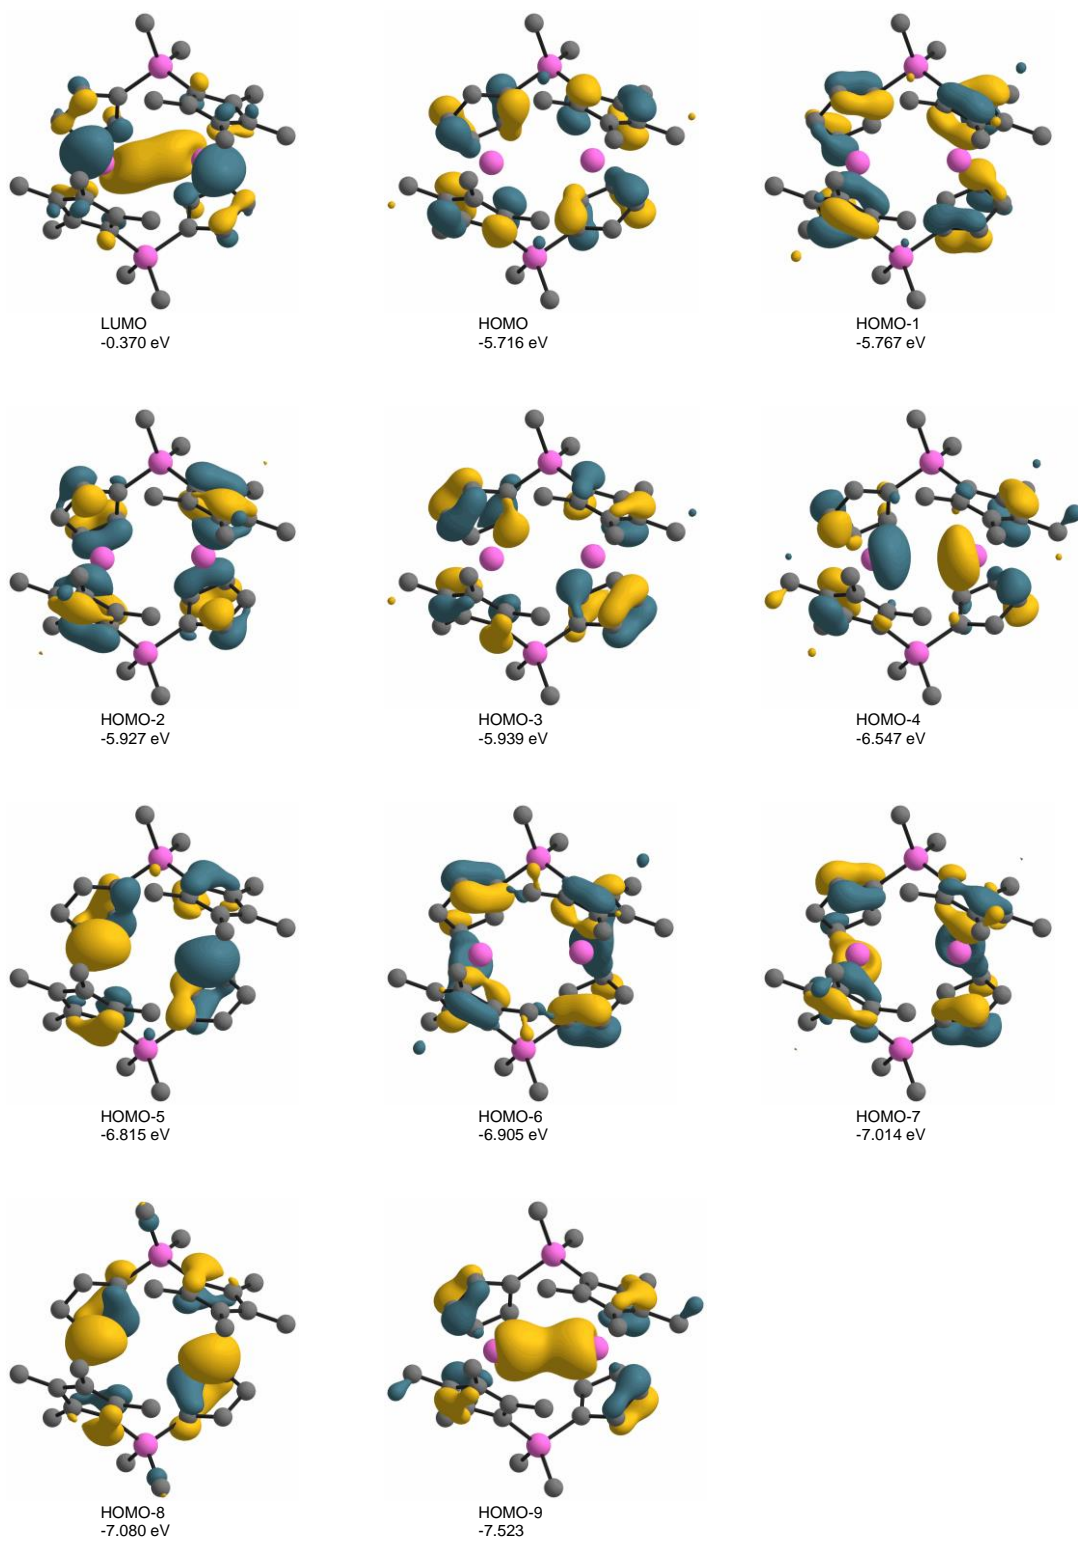

**Figure S16:** Kohn-Sham molecular orbital contours of **2b** (PBE0-D3/def2-TZVP//PBE0-D3/def2-TZVP; isovalue = 0.04 a.u.).

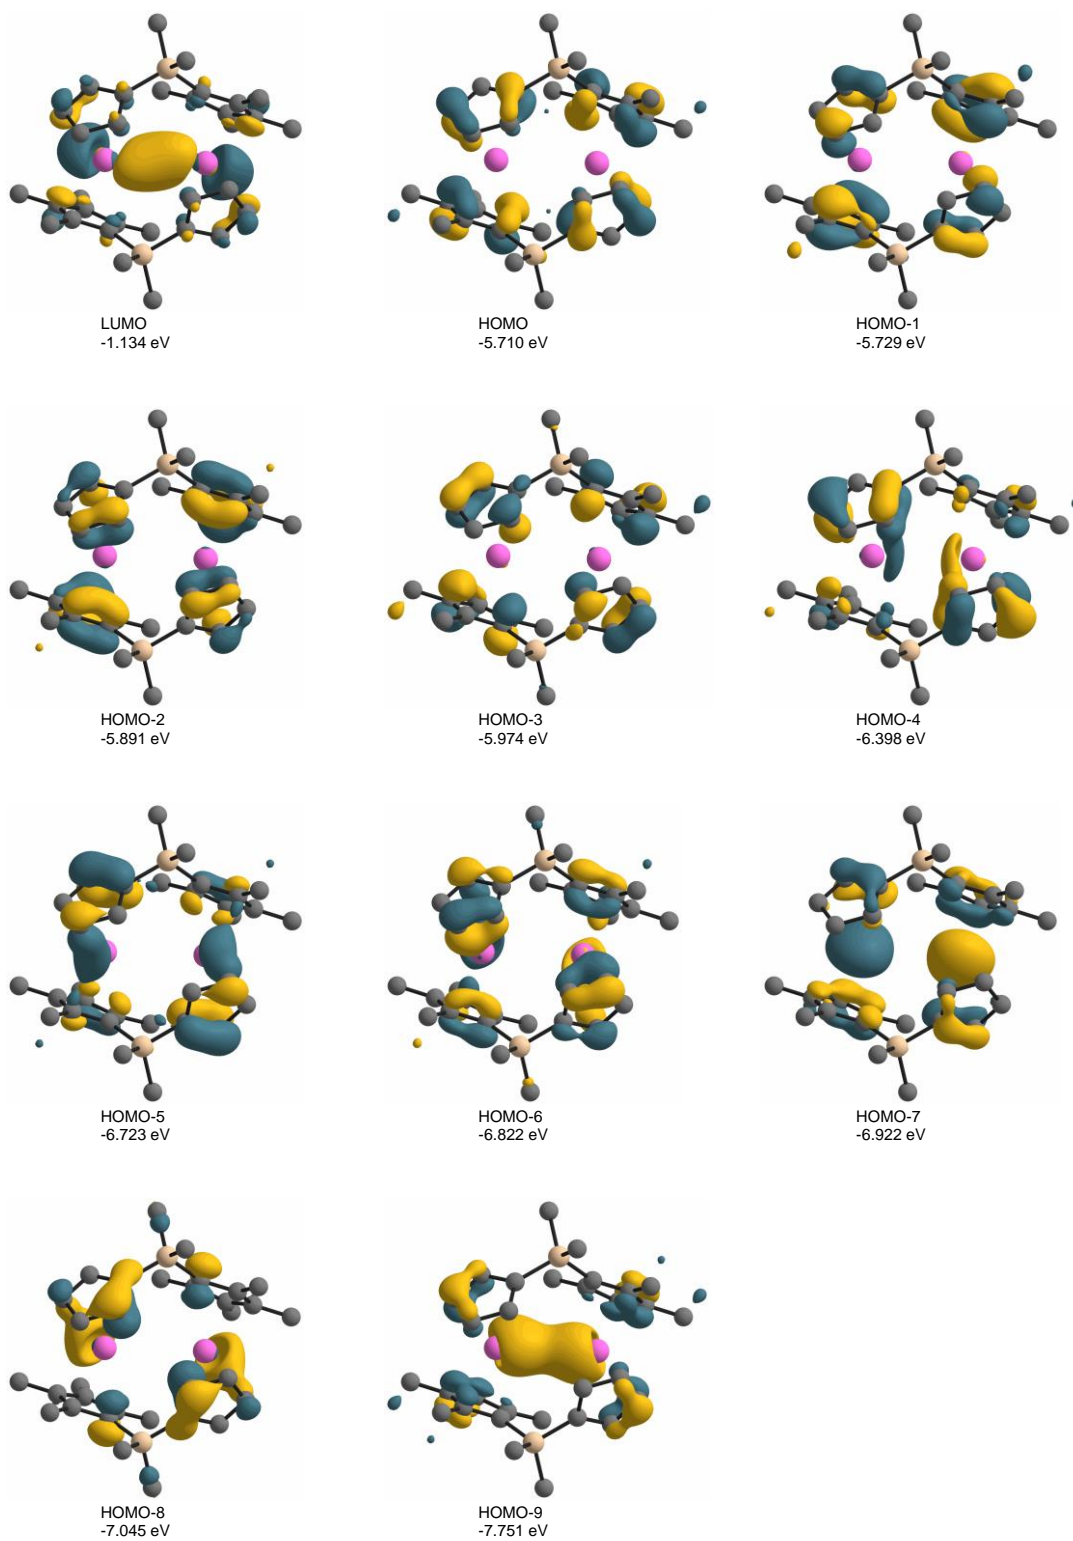

**Figure S17:** Kohn-Sham molecular orbital contour of **2c** (PBE0-D3/def2-TZVPP//PBE0-D3/def2-TZVP; isovalue = 0.04 a.u.).

## References

- [1] M. J. Frisch, G. W. Trucks, H. B. Schlegel, G. E. Scuseria, M. A. Robb, J. R. Cheeseman, G. Scalmani, V. Barone, G. A. Petersson, H. Nakatsuji, X. Li, M. Caricato, A. V. Marenich, J. Bloino, B. G. Janesko, R. Gomperts, B. Mennucci, H. P. Hratchian, J. V. Ortiz, A. F. Izmaylov, J. L. Sonnenberg, D. Williams-Young, F. Ding, F. Lipparini, F. Egidi, J. Goings, B. Peng, A. Petrone, T. Henderson, D. Ranasinghe, V. G. Zakrzewski, J. Gao, N. Rega, G. Zheng, W. Liang, M. Hada, M. Ehara, K. Toyota, R. Fukuda, J. Hasegawa, M. Ishida, T. Nakajima, Y. Honda, O. Kitao, H. Nakai, T. Vreven, K. Throssell, J. A. Montgomery, Jr., J. E. Peralta, F. Ogliaro, M. J. Bearpark, J. J. Heyd, E. N. Brothers, K. N. Kudin, V. N. Staroverov, T. A. Keith, R. Kobayashi, J. Normand, K. Raghavachari, A. P. Rendell, J. C. Burant, S. S. Iyengar, J. Tomasi, M. Cossi, J. M. Millam, M. Klene, C. Adamo, R. Cammi, J. W. Ochterski, R. L. Martin, K. Morokuma, O. Farkas, J. B. Foresman, and D. J. Fox, Gaussian, Inc., Wallingford CT, 2019.
- [2] a) A. Schaefer, H. Horn and R. Ahlrichs, *J. Chem. Phys.*, 1992, **97**, 2571; b) A. Schaefer, C. Huber and R. Ahlrichs, *J. Chem. Phys.*, 1994, **100**, 5829; c) F. Weigend and R. Ahlrichs, *Phys. Chem. Chem. Phys.*, 2005, **7**, 3297; d) F. Weigend, *Phys. Chem. Chem. Phys.*, 2006, **8**, 1057; e) J. P. Perdew, K. Burke and M. Ernzerhof, *Phys. Rev. Lett.*, 1996, **77**, 3865; f) J. P. Perdew, K. Burke and M. Ernzerhof, *Phys. Rev. Lett.*, 1997, **78**, 1396; g) C. Adamo and V. Barone, *J. Chem. Phys.*, 1999, **110**, 6158; h) S. Grimme, J. Antony, S. Ehrlich and H. Krieg, *J. Chem. Phys.*, 2010, **132**, 154104.
- [3] E. D. Glendening, C. R. Landis and F. Weinhold, *J. Comp. Chem.*, 2019, **40**, 25, 2234.
- [4] a) R. F. W. Bader, *Atoms in Molecules: A Quantum Theory*, Clarendon, Oxford, 1990; b) T. A. Keith and T. K. Gristmill, AIMAll, 19.02.13; Overland Park KS, USA (aim.tkgristmill.com), 2019.
